# Supplementary material for: Atrial Structural Remodeling Gene Variants in Patients with Atrial Fibrillation
Source: Hindawi journal article supplement (doi:10.1155/2018/4862480), 2018-09-10

# Atrial Fibrillation patients

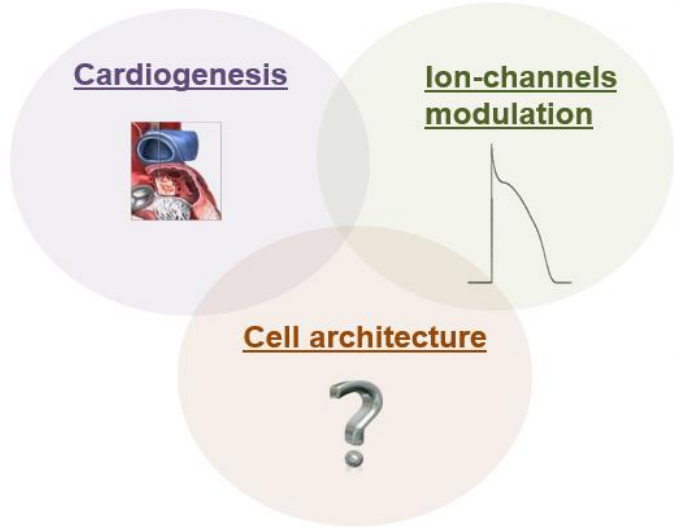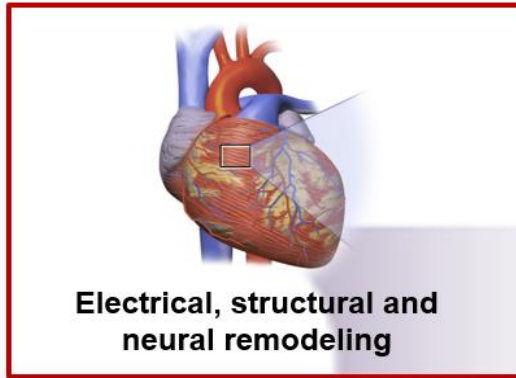

## Transcriptomic analysis on LA from AF patients

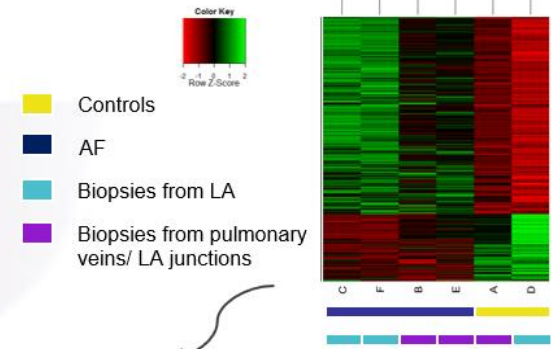

Gene Ontology: Atrial morphogenesis

**AF PANEL**  
55 GENES

## Cellular localization of proteins encoded by candidate genes

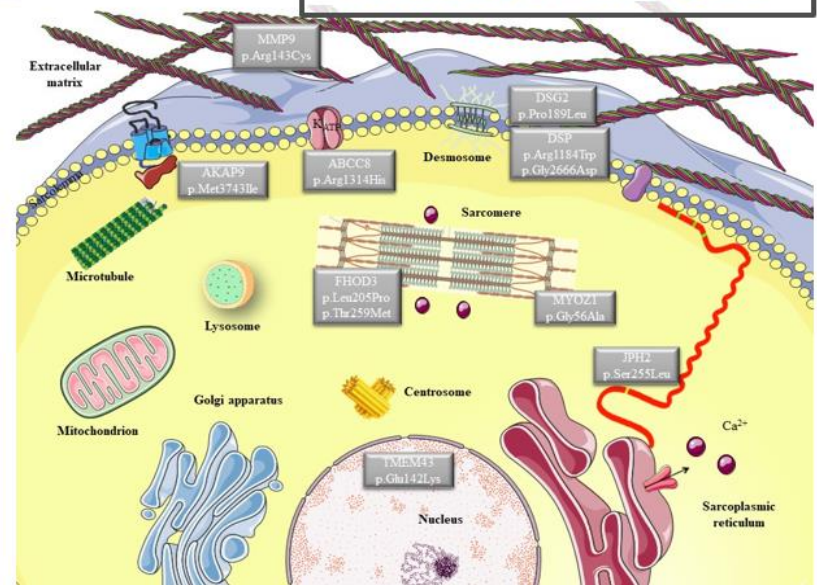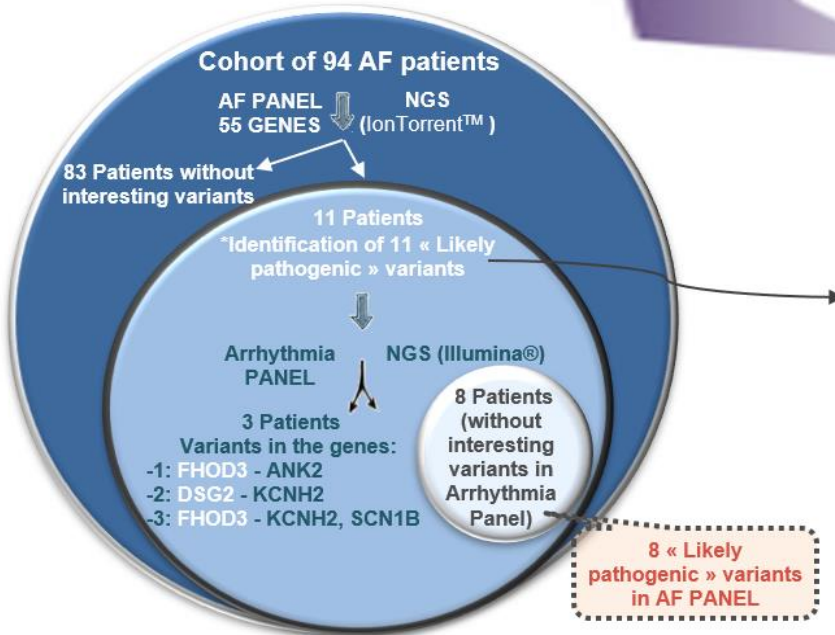

Supplement: f1 [file 4862480.f1.pdf]
